# Supplementary material
Source: PubMed Central journal article supplement (PMC4369194)
Supplement: NIHMS644548-supplement.pdf [file NIHMS644548-supplement.pdf]

**Supplementary information:**

*Journal of Hepatology (2014)*

**Endoplasmic reticulum heat shock protein gp96 maintains liver homeostasis and promotes hepatocellular carcinogenesis**

Saleh Rachidi<sup>1,2</sup>, Shaoli Sun<sup>3</sup>, Bill X Wu<sup>1,2</sup>, Elizabeth Jones<sup>4</sup>, Richard R. Drake<sup>4</sup>, Besim Ogretmen<sup>5</sup>, Ashley Cowart<sup>5,6</sup>, Christopher J. Clarke<sup>7</sup>, Yusuf A. Hannun<sup>7</sup>, Gabriela Chiosis<sup>8</sup>, Bei Liu<sup>1,2</sup> and Zihai Li<sup>1,2,\*</sup>

<sup>1</sup>Department of Microbiology and Immunology, <sup>2</sup>Hollings Cancer Center, <sup>3</sup>Department of Pathology, <sup>4</sup>Department of Cell and Molecular Pharmacology, <sup>5</sup>Department of Biochemistry and Molecular Biology, Medical University of South Carolina, Charleston, SC; <sup>6</sup>Ralph H. Johnson Veteran's Affairs Medical Center, Charleston, SC; <sup>7</sup>Department of Medicine, Stony Brook University, Stony Brook, New York; <sup>8</sup>Program in Molecular Pharmacology and Chemistry, Memorial Sloan-Kettering Cancer Center, New York, NY

\*Corresponding author. Tel: 843-792-1034; Fax: 843-792-9588; Email: [zihai@musc.edu](mailto:zihai@musc.edu)

Four figures.

Supplementary Figure 1  
Rachidi *et al.*

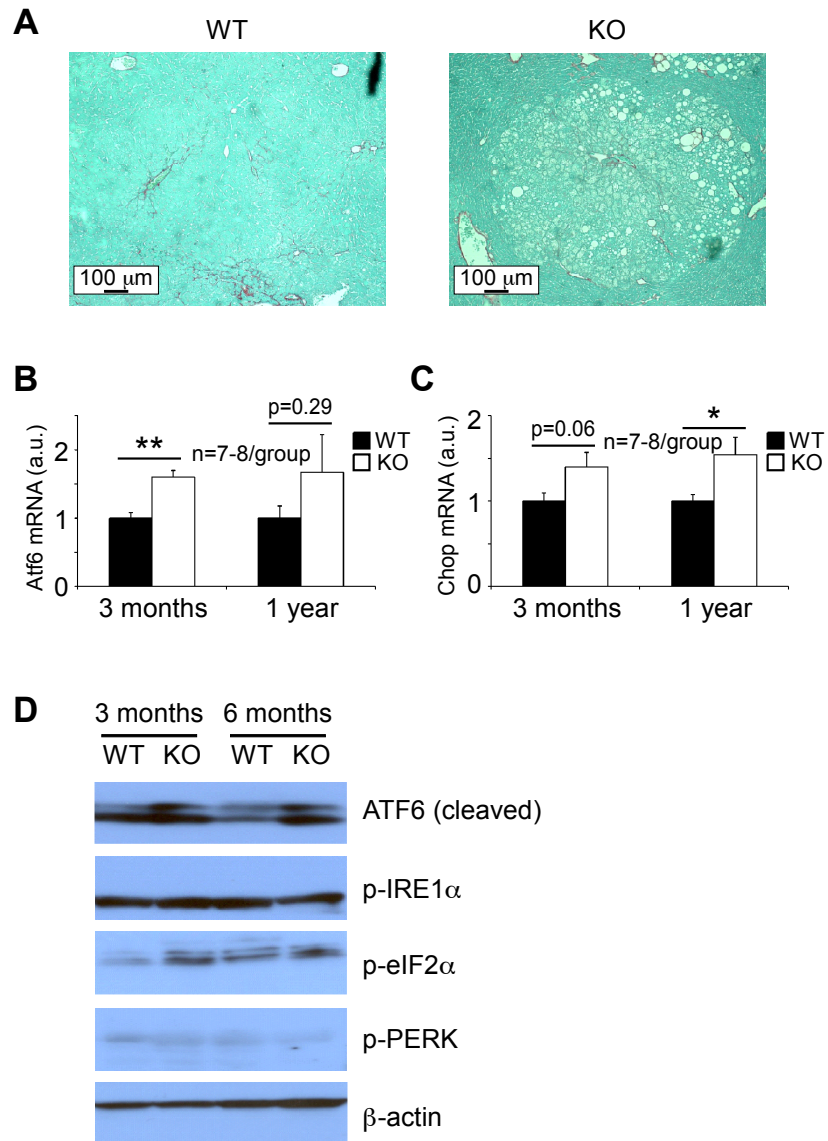

**Supplementary Figure 1. gp96 KO livers display no fibrosis and moderate levels of ER stress at baseline. (A)** WT and KO livers from 3 month-old males were stained with picosirius red for liver fibrosis. **(B,C)** qRT-PCR for ATF6 **(B)** and CHOP **(C)** on whole liver tissue from 3 month-old WT and KO mice (n=8 per group). **(D)** Immunoblot of whole liver cell lysates from 3 month and 6 month-old mice of indicated proteins (representative of 4 mice per group).

Supplementary Figure 2  
Rachidi *et al.*

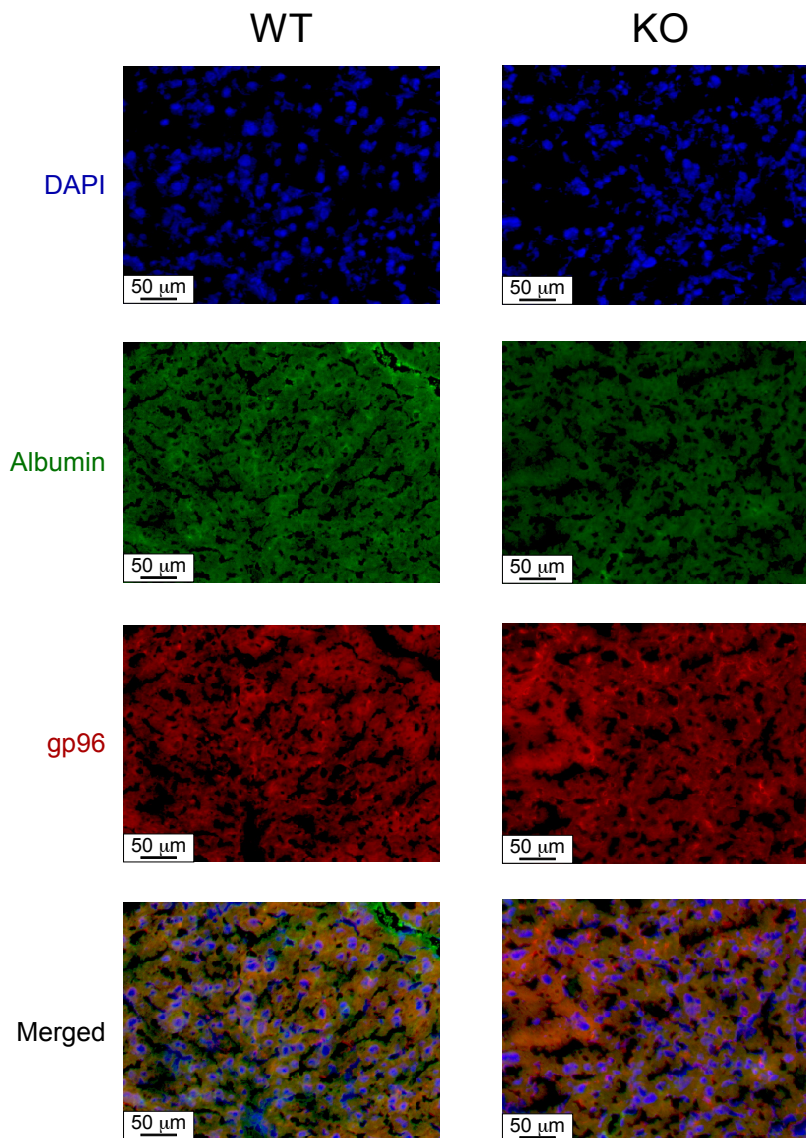

**Supplementary Figure 2. Tumor cells from both WT and Albumin-cre gp96 KO mice are gp96+ hepatocytes.** Sections of liver lesions from diethylnitrosamine (DENa)-treated mice 32 weeks post-injection were co-stained by immunofluorescence for albumin and gp96, and counterstained of nuclei with DAPI (diamidino-2-phenylindole).

Supplementary Figure 3  
Rachidi *et al.*

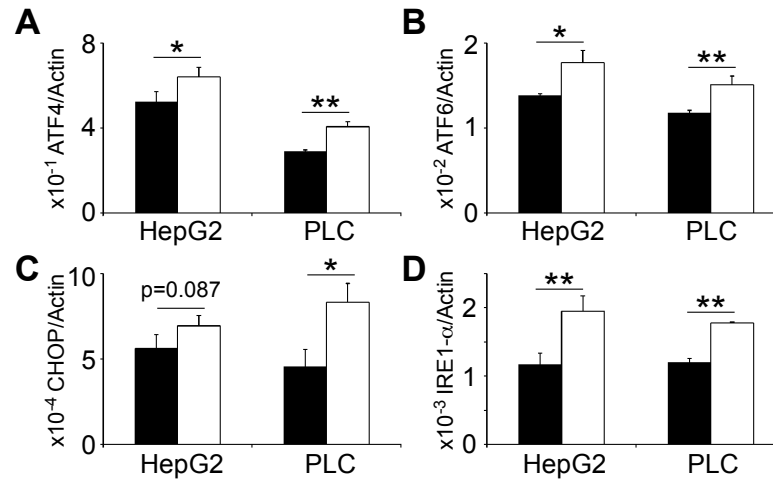

**Supplementary Figure 3. ER stress in hepatoma cells upon gp96 inhibition.** qRT-PCR for ATF4 (A), ATF6 (B), CHOP (C) and IRE-1 $\alpha$  (D) in PLC and HepG2 cells treated with 2  $\mu$ M (PLC) or 6  $\mu$ M (HepG2) WS13 for 36 hours. Error bars represent standard deviation.

Supplementary Figure 4  
Rachidi *et al.*

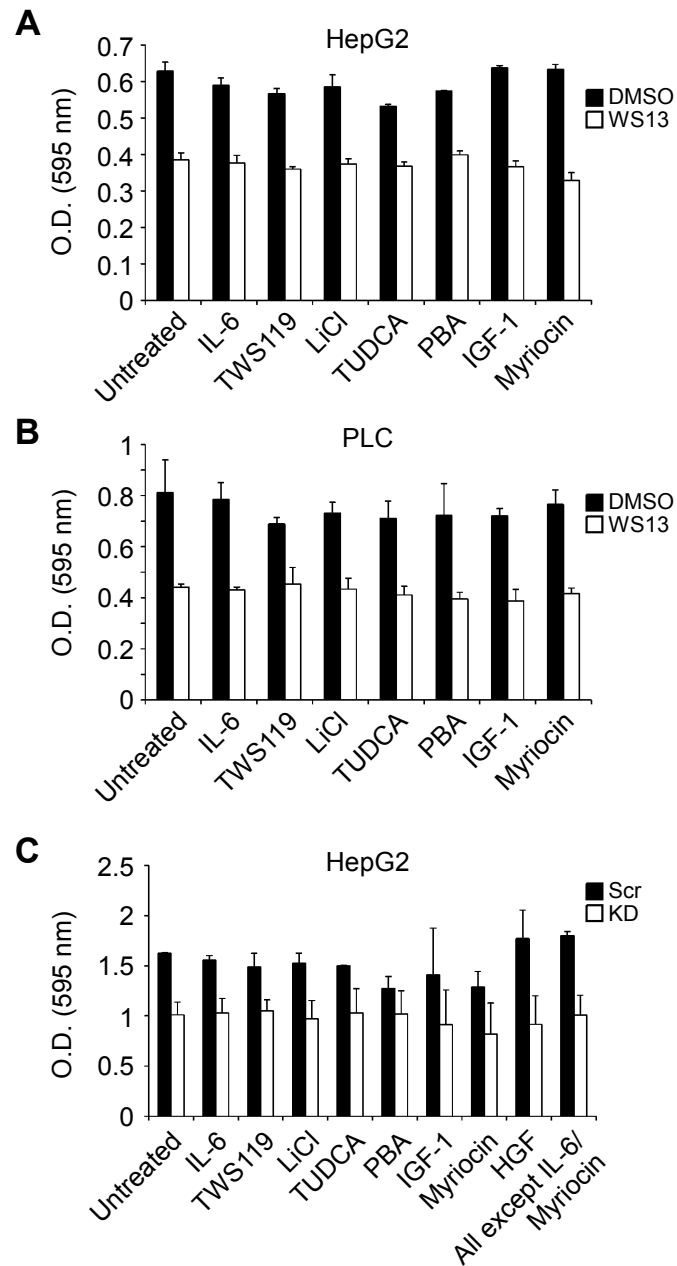

**Supplementary Figure 4. Rescue of ER homeostasis, Wnt signaling, IL-6 or IGF-1 or inhibition of *de novo* ceramide synthesis are not sufficient to restore cellular proliferation defect in response to selective gp96 inhibitor. (A,B)** HepG2 (A) and PLC (B) cells were treated with 20  $\mu$ M WS13 for 3 days, with or without IL-6, TWS119, LiCl, tauroursodeoxycholic acid (TUDCA), 4-phenylbutyric acid (PBA), IGF-1 or myriocin, followed by cell number quantification using MTT assay. (C) Scrambled shRNA or gp96 knockdown cells were cultured for 3 days with or without IL-6, TWS119, LiCl, tauroursodeoxycholic acid (TUDCA), 4-phenylbutyric acid (PBA), IGF-1, myriocin, hepatocyte growth factor (HGF) or a combination of them, followed by cell quantification using MTT assay.
